# Supplementary material for: A novel two-dimensional superconducting Ti layer: density functional theory and electron-beam irradiation
Source: Royal Society of Chemistry journal article supplement (doi:10.1039/d2nh00508e), 2023-01-01
Supplement: d2nh00508e1.pdf [file d2nh00508e1.pdf]

## A novel two-dimensional Superconducting Ti layer: density functional theory and electron beam irradiation

Xiao-Min Zhang<sup>a//</sup>, Jiawei Tang<sup>b//</sup>, Jing Zhang<sup>b</sup>, Jin Yu<sup>c</sup>, Litao Sun<sup>b</sup>, Zhiqing Yang<sup>d,e\*</sup>, Ke Xia<sup>a\*</sup>, Weiwei Sun<sup>b,c//,\*</sup>

<sup>a</sup> School of Physics, Southeast University, Nanjing 211189, China

<sup>b</sup> SEU-FEI Nano-Pico Center, Key Laboratory of MEMS of Ministry of Education, Southeast University, Nanjing 210096, China

<sup>c</sup> Jiangsu Province Key Laboratory of Advanced Metallic Materials, Southeast University, Nanjing, 219210, China

<sup>d</sup> Ji Hua Laboratory, Foshan 528251, China

<sup>e</sup> Foshan University, Foshan 528231, China

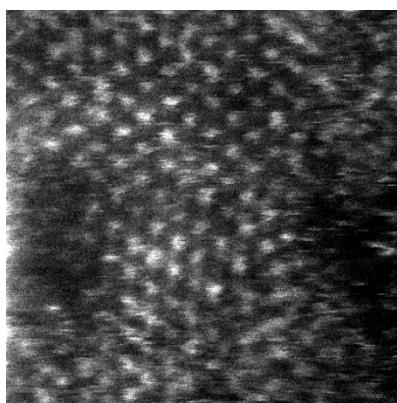

**Fig. S1.** A magnified STEM image recorded after tilting the sample for several degrees

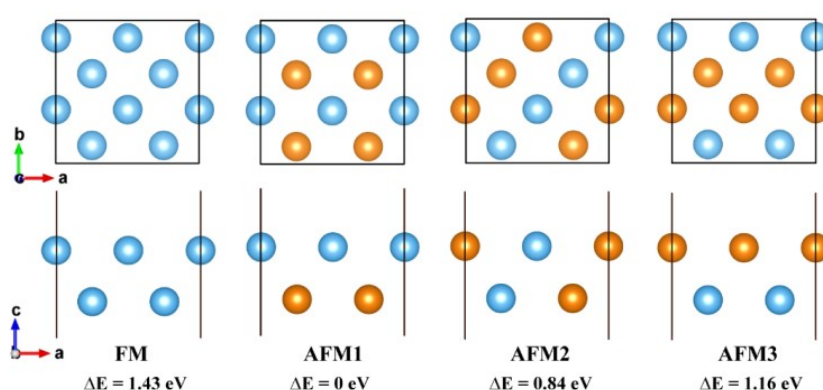

**Fig. S2.** The magnetic orders considered in this work, including FM and three AFM orders. The blue and yellow spheres represent atoms with opposite spin directions, respectively.

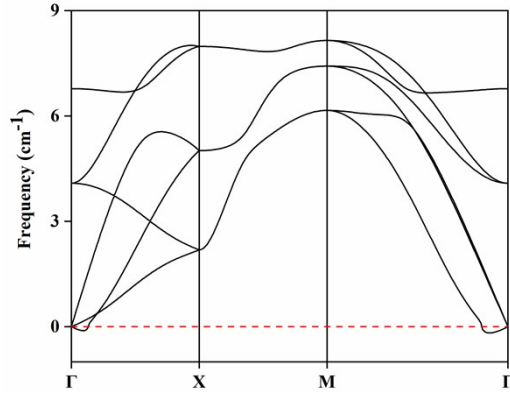

**Fig. S3.** Phonon dispersion curves obtained with DFT+U calculation ( $U=2\text{eV}$ ).

**Fig. S4.** The free energy (eV) along with the step of Ti layer calculated with (red) and without Hubbard U correction (black) at 300K. The averaged structures in each case are also provided on top of the free energy curves.

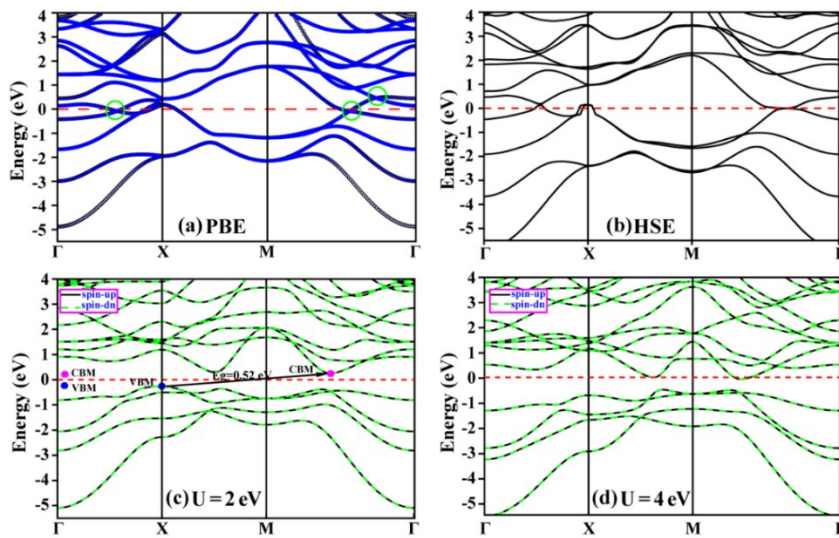

**Fig. S5.** The band structures of Ti layer calculated in (a) PBE, (b) HSE, (c) DFT+U:  $U=2\text{eV}$  and (d)  $U=4\text{eV}$ .

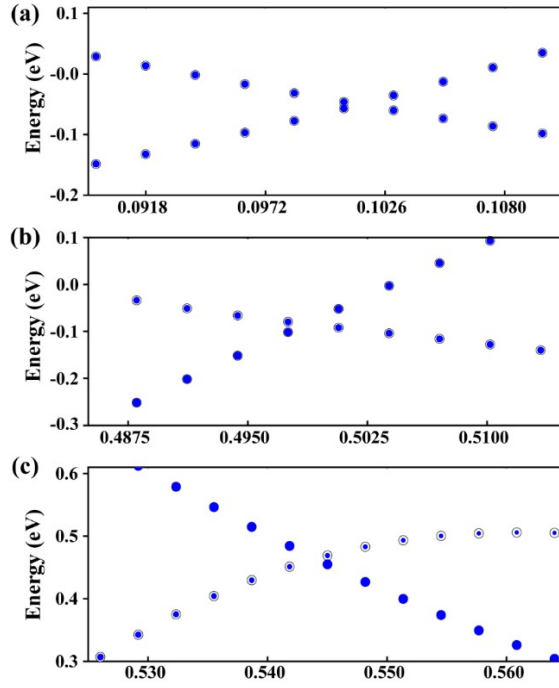

**Fig. S6.** (a-c) The bands of the Dirac points corresponding to the three points from left to the right of the band structure in Fig. 5(a).

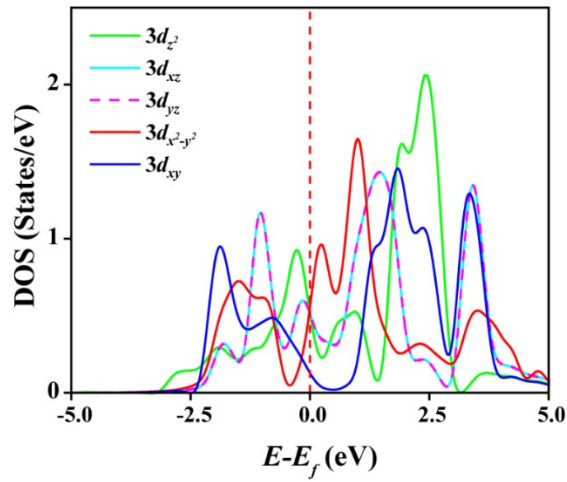

**Fig. S7.** The Ti-3d orbital-resolved DOS of the Ti monolayer obtained in the plain-DFT method.
